# Supplementary material
Source: publisher figshare collection journal article supplement (https://gsapubs.figshare.com/articles/dataset/_/14448111)
Supplement: Supplementary file 2 [file 1]

## **Precision and Accuracy of Modal Analysis Methods for Clastic Deposits and Rocks: a Statistical and Numerical Modeling Approach**

Pierre-Simon Ross<sup>1\*</sup>, Bernard Giroux<sup>1</sup>, Benjamin Latutrie<sup>1,2</sup>

1. Institut national de la recherche scientifique, 490 de la Couronne, Québec (QC), G1K 9A9, Canada
2. Now at Université Clermont Auvergne (UCA), Laboratoire Magmas et Volcans, 63000 Clermont-Ferrand, France

\* Corresponding author, [rossps@ete.inrs.ca](mailto:rossps@ete.inrs.ca)

---

### **Supplemental File 2**

## **FIGURES FOR COLOR-BLIND PEOPLE**

Figures 3 and 4 in the paper feature blue and red circles on a green background, since this is how our models were constructed. Red versus green is difficult to differentiate for some people, so this supplemental file presents similar figures with a gray background. The specific slices illustrated are not exactly the same in figure 3.

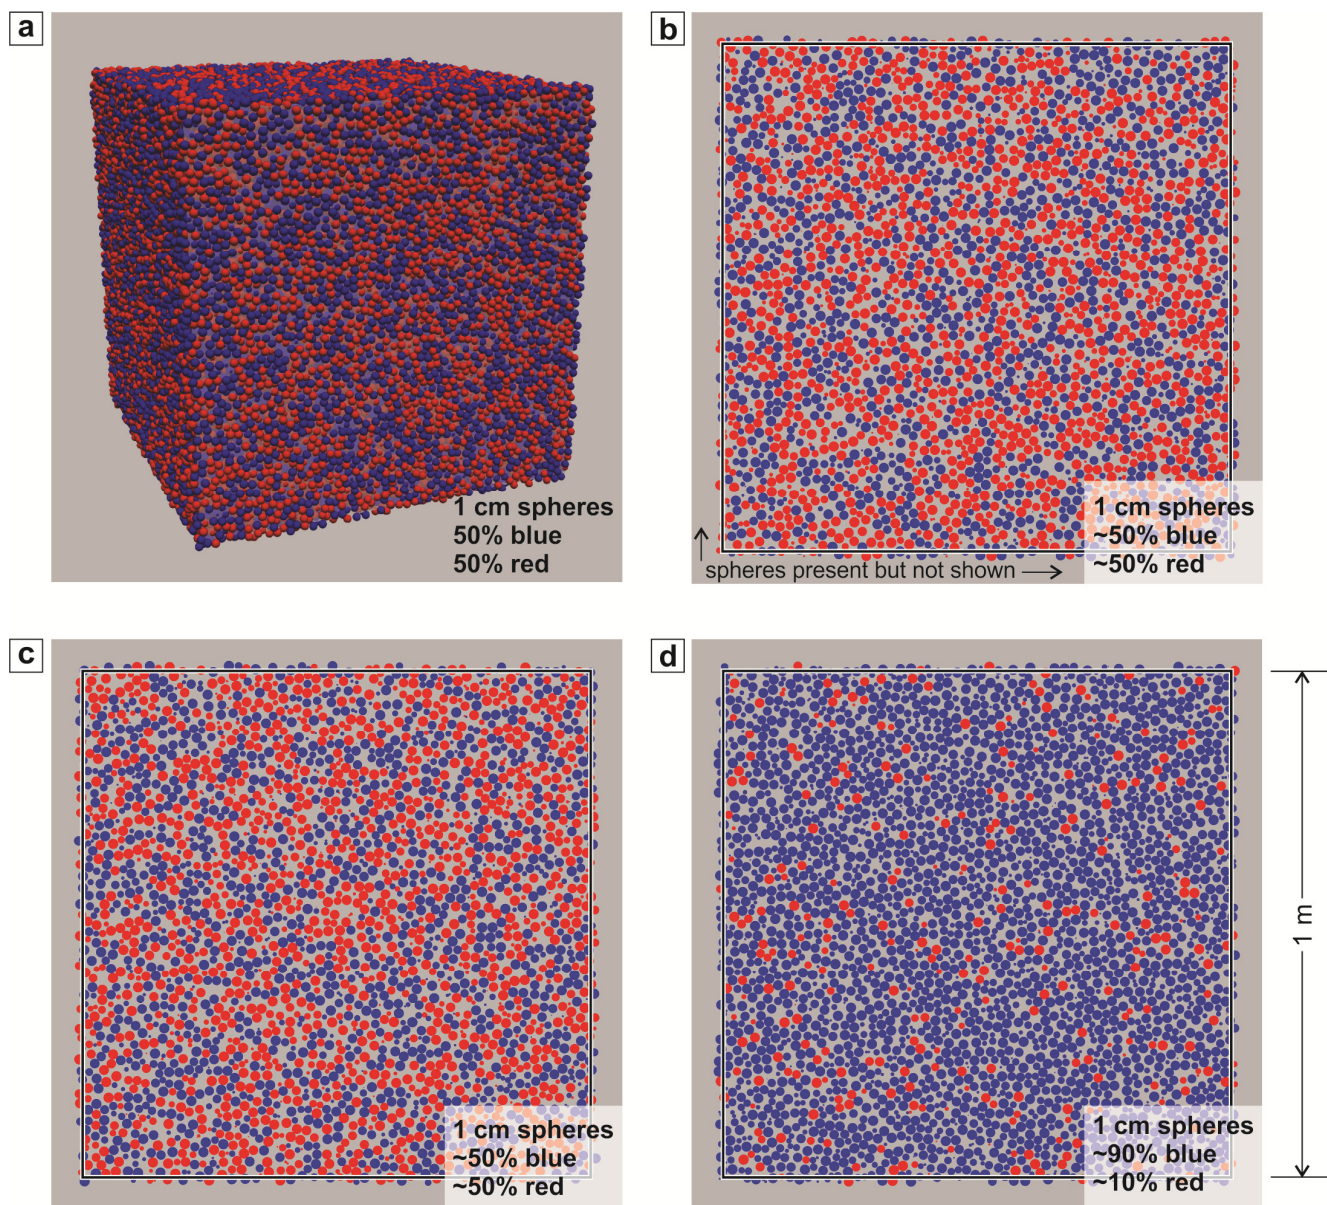

**Figure 3 (gray background version)** Equal size sphere models with red and blue spheres of 1 cm radius. a) 3D model of  $1 \text{ m}^3$  comprising 50% red spheres and 50% blue spheres. b) and c) Slices through the same 3D model. d) Horizontal slice through a different model, comprising 10% red spheres and 90% blue spheres.



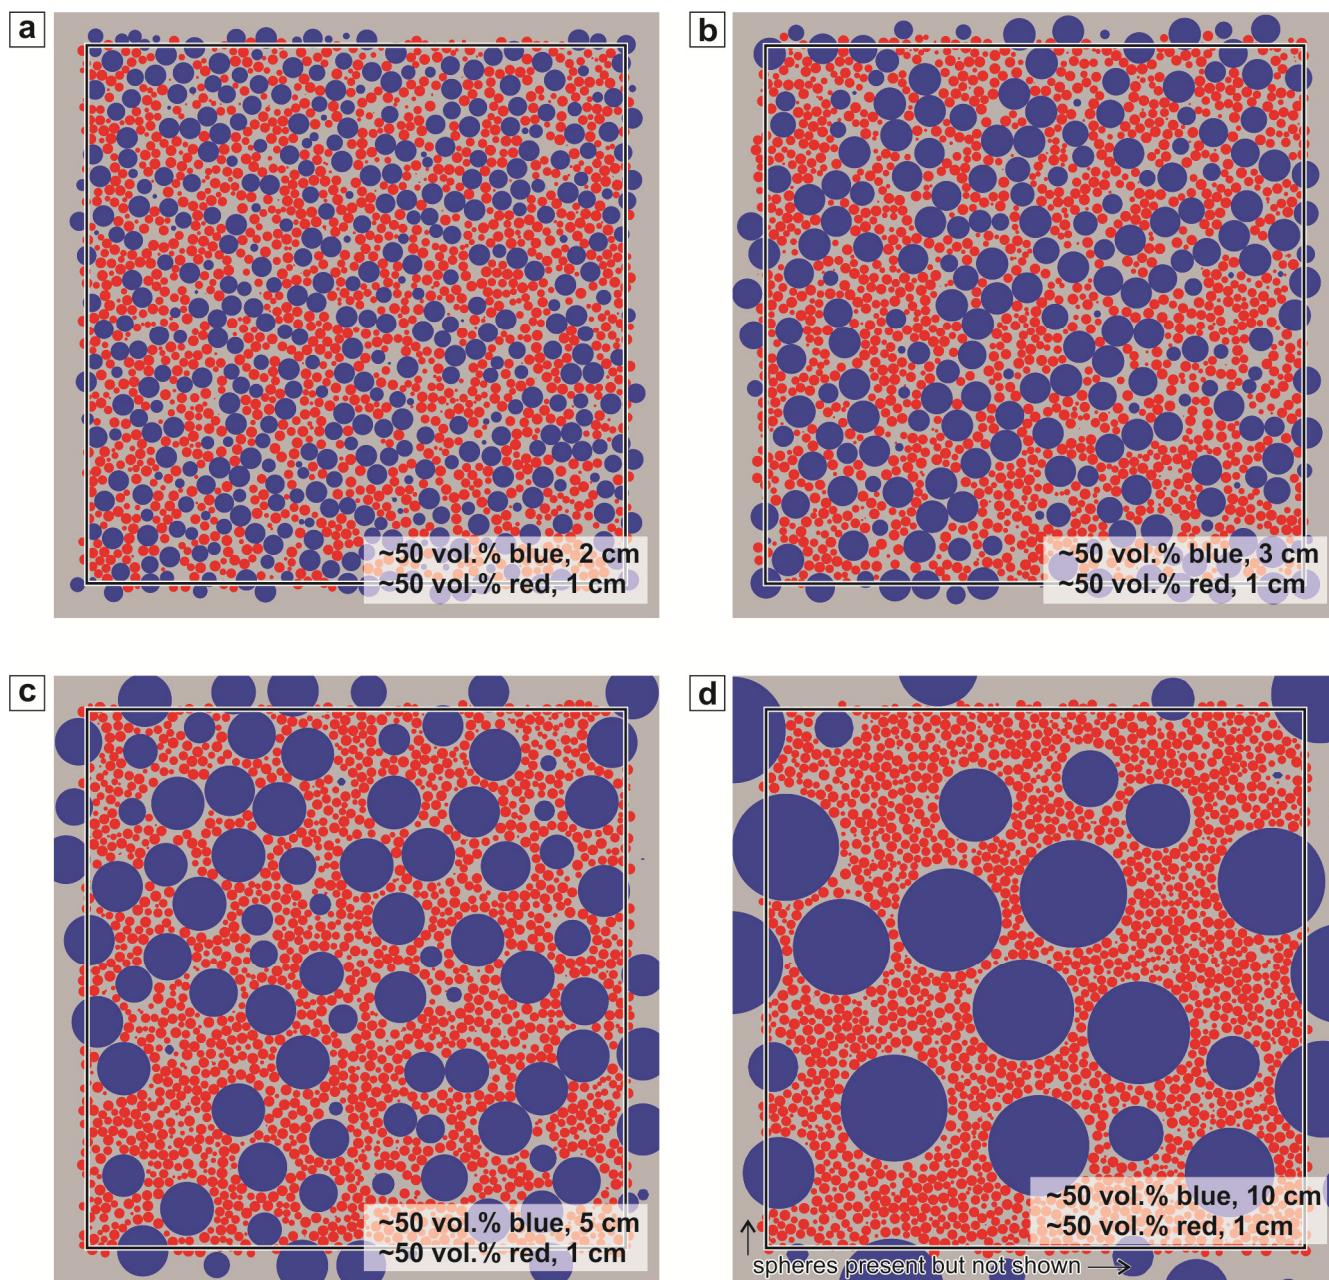

**Figure 4 (gray background version)** Horizontal slices through the middle of unequal sphere models containing ~50% red spheres and ~50% blue spheres: a) 1 cm radius red spheres and 2 cm radius blue spheres (1&2 cm); b) 1&3 cm; c) 1&5 cm; and d) 1&10 cm.
